# Supplementary material for: Anti-Candida and Anti-Leishmanial Activities of Encapsulated Cinnamomum verum Essential Oil in Chitosan Nanoparticles
Source: MDPI journal article supplement (doi:10.3390/molecules28155681), 2023-07-27
Supplement: s1 [file s1]

# SUPPLEMENTARY DATA

## Anti-Candida and Anti-leishmanial Activities of Encapsulated *Cinnamomum verum* Essential Oil in Chitosan Nanoparticles

Rym Essid<sup>1,\*</sup>, Ameni Ayed<sup>1</sup>, Kais Djebali<sup>2</sup>, Houda Saad<sup>3</sup>, Mondher Srasra<sup>3</sup>, Yasmine Othmani<sup>1</sup>, Nadia Fares<sup>1</sup>, Selim Jallouli<sup>1</sup>, Islem Abid<sup>4</sup>, Monerah Rashed Alothman<sup>4</sup>, Ferid Limam<sup>1</sup> and Olfa Tabbene<sup>1</sup>

- <sup>1</sup> Laboratoire des Substances Bioactives, Centre de Biotechnologie de Borj-Cedria, BP 901, Hammam-lif 2050, Tunisia; ayed.amenicbbc@gmail.com (A.A.); yasmine.oth@gmail.com (Y.O.); fares.nadia@yahoo.fr (N.F.); selimjallouli80@gmail.com (S.J.); limam\_ferid@yahoo.fr (F.L.); tabb\_olfa@yahoo.fr (O.T.)
  - <sup>2</sup> Valorization of Useful Material Laboratory (LVMU), National Research Center in Material Sciences (CNRSM) Technopôle Borj Cedria, BP 73, 8027 Soliman – Tunisia/ Tél.:+216 79 325 280 / Fax:+21679 325 314.kais.djebali@gmail.com.
  - <sup>3</sup> Centre National en Recherche en Sciences des Matériaux, “CNRSM” Technopole Borj-Cedria-Route Touristique Soliman, BP-273, Soliman8027, Tunisia;saad\_houda@yahoo.com (H.S.); mondher.srasra@gmail.com (M.S.)
  - <sup>4</sup> Department of Botany and Microbiology, College of Science, King Saud University, P.O. 2455, Riyadh11451, Saudi Arabia
- \* Correspondence: essidrym@hotmail.com; Tel.: +216-71-890-827

**Table S1.** Plackett-Burman matrix for the chosen responses

| No. | Method<br>$X_1$ | Chitosan<br>MW $X_2$ | [TPP]<br>(mg/mL)<br>$X_3$ | <i>C. verum</i><br>EO/chitosan ratio<br>$X_4$ | Reaction<br>time (h) $X_5$ | Encapsulation<br>efficiency<br>$Y_1$ (%) | Anti-candida<br>activity MIC<br>$Y_2$ (µg/mL) |
|-----|-----------------|----------------------|---------------------------|-----------------------------------------------|----------------------------|------------------------------------------|-----------------------------------------------|
| 1   | -1              | -1                   | -1                        | +1                                            | +1                         | 85.38                                    | 2300                                          |
| 2   | +1              | -1                   | -1                        | -1                                            | -1                         | 80.38                                    | 2500                                          |
| 3   | -1              | +1                   | -1                        | -1                                            | -1                         | 75.33                                    | 2400                                          |
| 4   | +1              | +1                   | -1                        | +1                                            | -1                         | 82.21                                    | 2200                                          |
| 5   | -1              | -1                   | +1                        | +1                                            | -1                         | 84.11                                    | 1280                                          |
| 6   | +1              | -1                   | +1                        | -1                                            | +1                         | 82.06                                    | 580                                           |
| 7   | -1              | +1                   | +1                        | -1                                            | -1                         | 79.26                                    | 152.5                                         |
| 8   | +1              | +1                   | +1                        | +1                                            | +1                         | 84.75                                    | 307                                           |
| 9   | -1              | 0                    | 0                         | 0                                             | 0                          | 90.16                                    | 2020                                          |
| 10  | +1              | 0                    | 0                         | 0                                             | 0                          | 90.31                                    | 2060                                          |
| 11  | -1              | 0                    | 0                         | 0                                             | 0                          | 90.74                                    | 2010                                          |
| 12  | +1              | 0                    | 0                         | 0                                             | 0                          | 90.02                                    | 2050                                          |
| 13  | -1              | 0                    | 0                         | 0                                             | 0                          | 90.60                                    | 2030                                          |
| 14  | +1              | 0                    | 0                         | 0                                             | 0                          | 90.60                                    | 2070                                          |

MW: molecular weigh. [TPP]: TPP concentration.

**Table S2.** Coefficient signification of the studied factors for encapsulation efficiency (%) and Anti-candida activity responses

| Encapsulation efficiency (%)      |                        |                   |                  |               |
|-----------------------------------|------------------------|-------------------|------------------|---------------|
| Factor name                       | Regression coefficient | SD <sup>(a)</sup> | t <sup>(b)</sup> | signification |
| Constant                          | 85.42                  | 0.08              | 1086.01          | <0.01***      |
| Method                            | 0.33                   | 0.08              | 4.31             | 1.30*         |
| Chitosan MW                       | -1.29                  | 0.10              | -12.48           | <0.01***      |
| [TPP] (mg/mL)                     | 0.86                   | 0.10              | 8.26             | 0.10**        |
| <i>C. verum</i> EO/Chitosan ratio | 2.42                   | 0.10              | 23.33            | <0.01***      |
| Reaction time (h)                 | 0.19                   | 0.10              | 1.88             | 13.30         |
| Anti-candida activity MIC (µg/mL) |                        |                   |                  |               |
| Factor name                       | Regression coefficient | SD                | t                | signification |
| Constant                          | 1711.39                | 2.67              | 640.34           | <0.01***      |
| Method                            | -30.39                 | 2.67              | -11.37           | <0.01***      |
| Chitosan MW                       | -200.06                | 3.53              | -56.58           | <0.01***      |
| [TPP] (mg/mL)                     | -885.06                | 3.53              | -250.33          | <0.01***      |
| <i>C. verum</i> EO/Chitosan ratio | 56.81                  | 3.53              | 16.06            | <0.01***      |
| Reaction time (h)                 | -68.18                 | 3.53              | -19.28           | <0.01***      |

*C. verum* EO: Cinnamon verum essential oil

**Table S3.** Experimental conditions and obtained responses according to Box-Behnken Matrix

| No. exp | [TPP] (mg/mL) | <i>C. verum</i> EO/chitosan ratio | Reaction time (h) | Encapsulation efficiency (%) | Anti-candida activity MIC (µg/mL) |
|---------|---------------|-----------------------------------|-------------------|------------------------------|-----------------------------------|
| 1       | -1            | -1                                | 0                 | 82.56                        | 1200                              |
| 2       | +1            | -1                                | 0                 | 80.23                        | 600                               |
| 3       | -1            | +1                                | 0                 | 83.35                        | 240                               |
| 4       | +1            | +1                                | 0                 | 92.58                        | 125                               |
| 5       | -1            | 0                                 | -1                | 74.19                        | 2700                              |
| 6       | +1            | 0                                 | -1                | 62.90                        | 4000                              |
| 7       | -1            | 0                                 | +1                | 79.20                        | 1200                              |
| 8       | +1            | 0                                 | +1                | 81.44                        | 1000                              |
| 9       | 0             | -1                                | -1                | 60.33                        | 1500                              |
| 10      | 0             | +1                                | -1                | 73.25                        | 1100                              |
| 11      | 0             | -1                                | +1                | 70.33                        | 3000                              |
| 12      | 0             | -1                                | +1                | 85.61                        | 500                               |
| 13      | 0             | 0                                 | 0                 | 80.31                        | 2400                              |
| 14      | 0             | 0                                 | 0                 | 80.25                        | 2420                              |
| 15      | 0             | 0                                 | 0                 | 81.12                        | 2440                              |
| 16      | 0             | 0                                 | 0                 | 81.54                        | 2350                              |
| 17      | 0             | 0                                 | 0                 | 80.38                        | 2390                              |
| 18      | 0             | 0                                 | 0                 | 80.14                        | 2450                              |
| 19      | 0             | 0                                 | 0                 | 80.46                        | 2480                              |
| 20      | 0             | 0                                 | 0                 | 81.81                        | 2430                              |

**Table S4.** Statistical signification of the coefficients and the interactions of the studied factors

| Factors                                        | Encapsulation |      |        |               | Anti-candida activity MIC |       |        |               |
|------------------------------------------------|---------------|------|--------|---------------|---------------------------|-------|--------|---------------|
|                                                | Value (%)     | SD   | t      | signification | Value (µg/mL)             | SD    | t      | Signification |
| Mean/Interc.                                   | 80.98         | 0.33 | 245.49 | <0.01***      | 2414.00                   | 18.05 | 133.69 | <0.01***      |
| [TPP] (L) $a_3$                                | -0.26         | 0.26 | -1.03  | 36.10         | 48.12                     | 14.27 | 3.37   | 2.801*        |
| [TPP] (Q) $a_{33}$                             | 2.87          | 0.35 | 7.99   | 0.13          | -586.37                   | 19.67 | -29.80 | <0.01***      |
| <i>C. verum</i> EO/chitosan ratio (L) $a_4$    | 5.16          | 0.26 | 19.81  | <0.01***      | -541.87                   | 14.27 | -37.96 | <0.01***      |
| <i>C. verum</i> EO/chitosan ratio (Q) $a_{44}$ | 0.82          | 0.35 | 2.28   | 8.42          | -1286.38                  | 19.67 | -65.38 | <0.01***      |
| Reaction time (L) $a_5$                        | 5.73          | 0.26 | 22.00  | <0.01***      | -450.00                   | 14.27 | -31.52 | <0.01***      |
| Reaction time (Q) $a_{55}$                     | -9.42         | 0.36 | -26.22 | <0.01***      | 397.38                    | 19.67 | 20.19  | <0.01***      |
| $a_{34}$                                       | 2.89          | 0.37 | 7.83   | 0.14**        | 121.25                    | 20.18 | 6.00   | 0.387**       |
| $a_{35}$                                       | 3.38          | 0.37 | 9.17   | 0.08**        | -375.00                   | 20.18 | -18.57 | <0.01***      |
| $a_{45}$                                       | 0.59          | 0.37 | 1.60   | 18.49         | -525.00                   | 20.18 | -26.00 | <0.01***      |

(\*\*\*, \*\* and\*): level of significance of (<0.01%, <1% and<5% respectively); L, Q: linear and quadratic terms.

**Table S5.** Predicted and observed values of the studied responses for validation runs

| Optimal conditions                |                              |                                   |
|-----------------------------------|------------------------------|-----------------------------------|
| Factor name                       | Level                        | Value                             |
| [Tpp] (mg/mL)                     | +1                           | 1                                 |
| <i>C. verum</i> EO/chitison ratio | +1                           | 2                                 |
| Reaction time (h)                 | +0.5                         | 2.5                               |
| Chosen responses                  |                              |                                   |
|                                   | Encapsulation efficiency (%) | Anti-candida activity MIC (µg/mL) |
| Predicted                         | 95                           | 115                               |
| Observed                          | 93 ± 3                       | 120 ± 9.83                        |

**Table S6.** Studied factors for the two investigated responses: Encapsulation efficiency and anti-candida activity

| Factors name                      | Unit  | Code  | Coded levels |        |      |
|-----------------------------------|-------|-------|--------------|--------|------|
|                                   |       |       | -1           | 0      | +1   |
| Method                            | -     | $X_1$ | A            | -      | B    |
| Chitosan MW                       | -     | $X_2$ | Low          | Medium | High |
| [TPP]                             | mg/mL | $X_3$ | 0.05         | 0.525  | 1    |
| <i>C. verum</i> EO/chitosan ratio | -     | $X_4$ | 0.25         | 1.125  | 2    |
| Reaction time (h)                 | h     | $X_5$ | 1            | 2      | 3    |

MW: molecular weigh

*C. verum* EO: *Cinnamon verum* essential oil

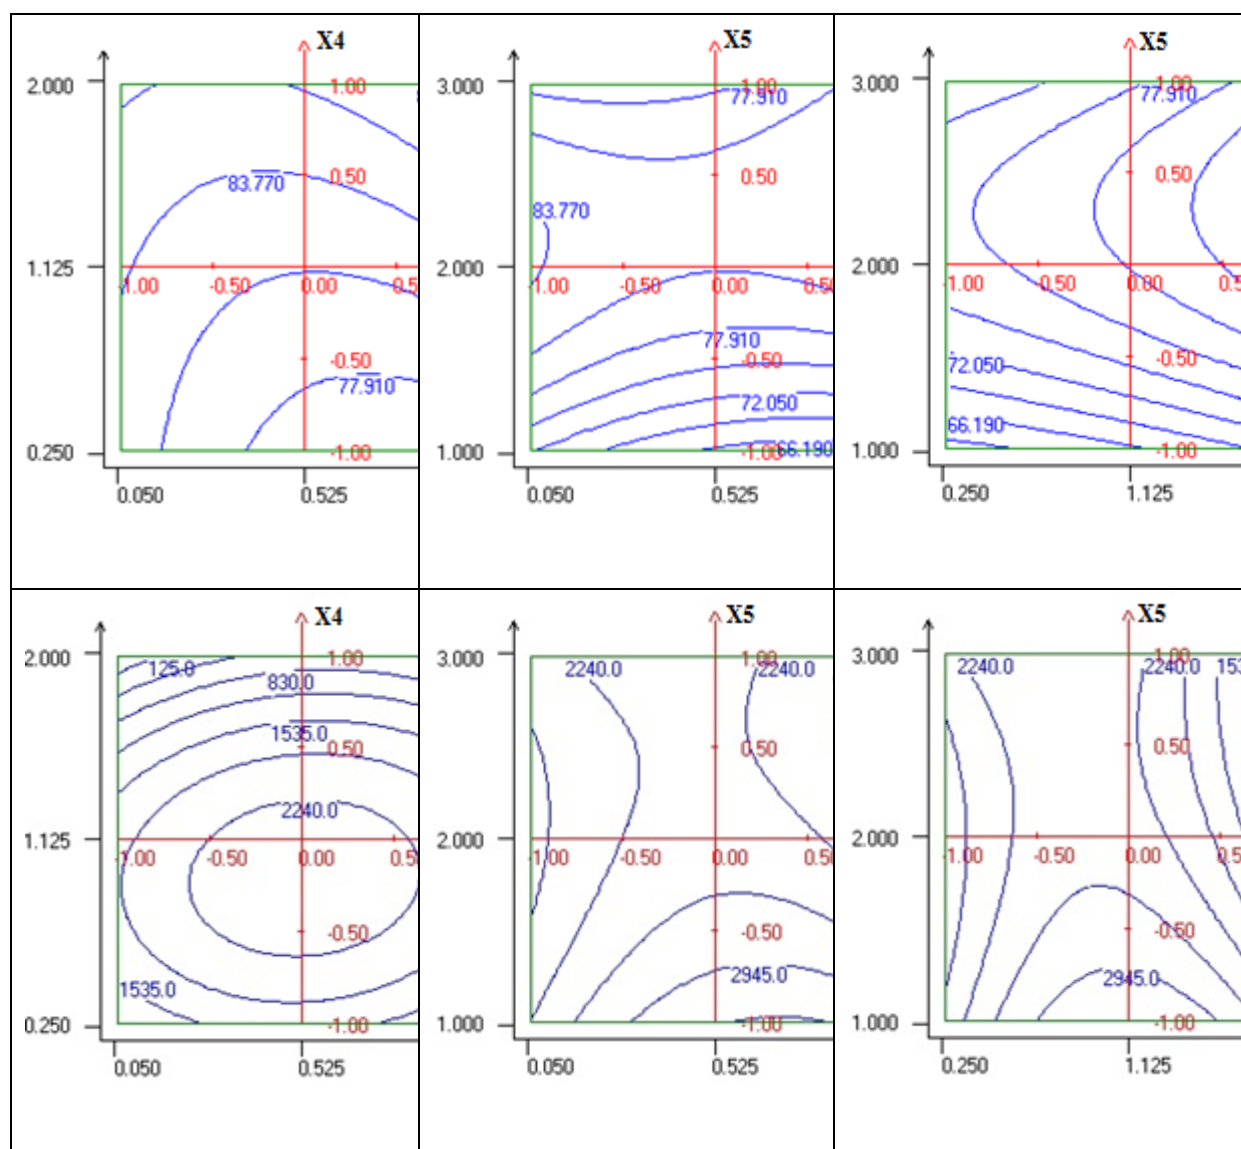

— Encapsulation efficiency  
 — Anti-candida activity MIC

**Figure S1:** Plotted curves of the chosen responses (Encapsulation efficiency and Anti-candida activity MIC) under the experimental space obtained by the axis of the factors ([TPP] ( $X_3$ ), EO/chitosan ratio ( $X_4$ ) and Reaction time ( $X_5$ ))

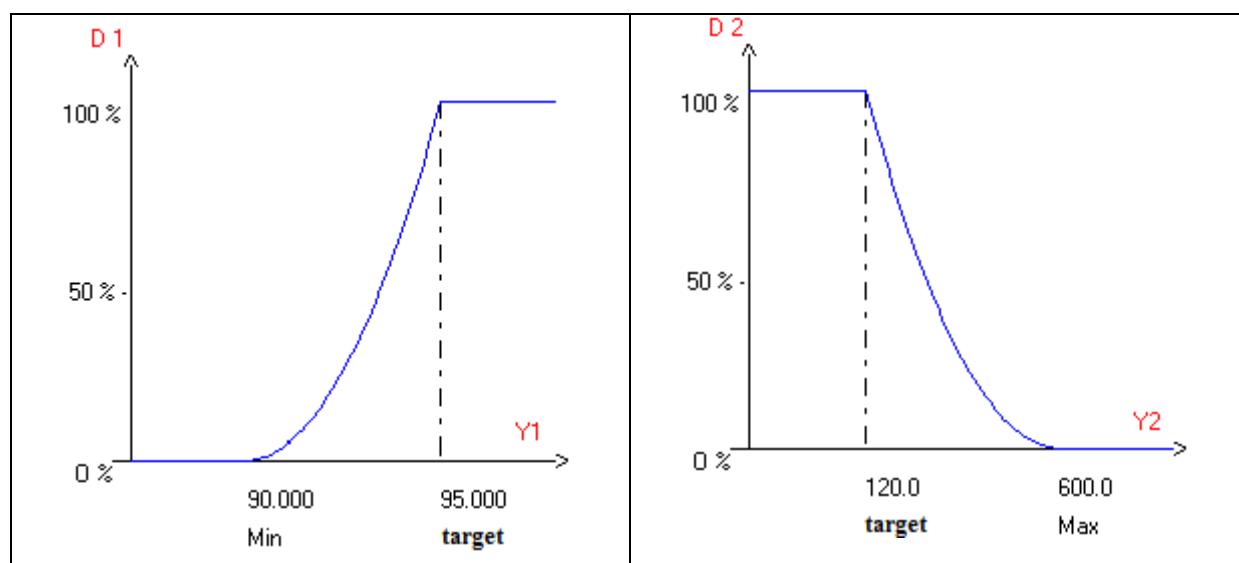

**Figure S2.** Individual desirability plot of the encapsulation ( $Y_1$ ) and the anti-candida activity ( $Y_2$ ) responses

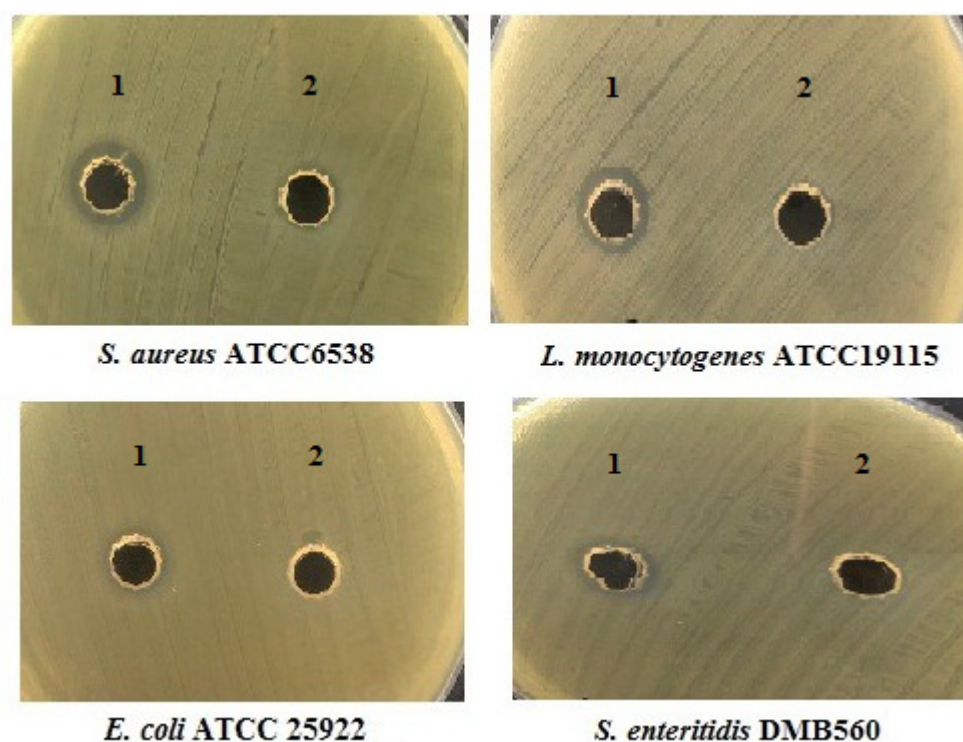

**Figure S3.** Antibacterial activity of *C. verum* EO/CN-NPs (1) and CN-NPs (2)
